# Supplementary material for: Ecosystem transplant from a healthy reef boosts coral health at a degraded reef
Source: PubMed Central journal article supplement — Nat Commun. 2024 Nov 19;15:10033. doi: 10.1038/s41467-024-54149-6 (PMC11577037; doi:10.1038/s41467-024-54149-6), 2024-11-19
Supplement: 41467_2024_54149_MOESM1_ESM.pdf [file 41467_2024_54149_MOESM1_ESM.pdf]

Supplementary Information for

**Ecosystem transplant from a healthy reef boosts coral health at a degraded reef**

Levy et al.

\*Correspondence to: [nrlevy@ucsd.edu](mailto:nrlevy@ucsd.edu) and [oren.levy@biu.ac.il](mailto:oren.levy@biu.ac.il)

This PDF file includes:

Supplementary Figures 1-9

Supplementary Tables 1-13

## Supplementary Figures

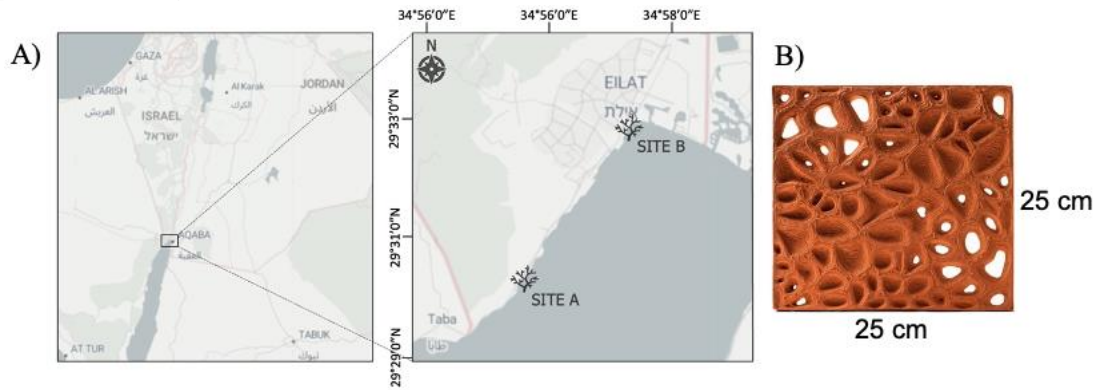

**Fig. 1. Location of study and tile design.** **A)** Map of study sites in the Gulf of Eilat/Aqaba, Red Sea (29.5° N) and in its greater geographic location. Map contributors: Leaflet, ©OpenStreetMap, CC-BY-SA, ©Stadia Maps, ©OpenMapTiles, and ©OpenStreetMap (Created in R v4.3.1). **B)** Top view of the biomimetic terracotta tile used in the study.

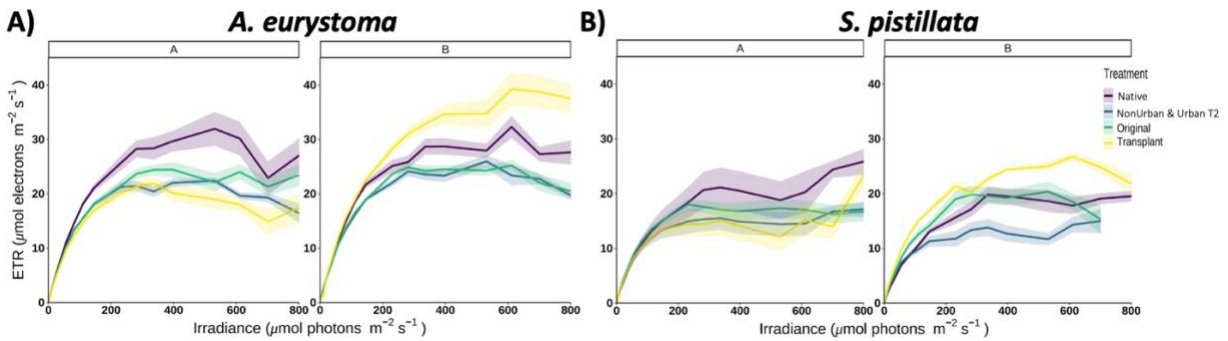

**Fig. 2. Regression plot of the raw data for A) *A. eurystoma* and B) *S. pistillata* for each site and treatment, showing the relationship between irradiance and ETR. Average ETR  $\pm$  SE for each irradiance level (n= 5).**

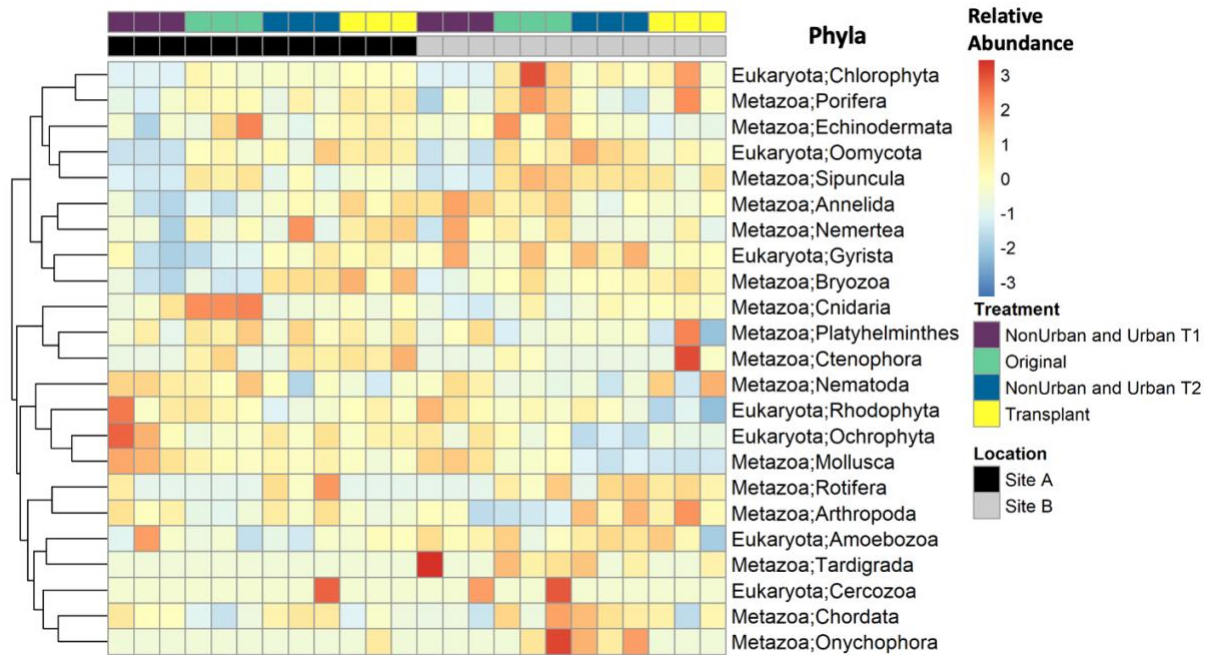

**Fig. 3. Relative read abundance of main invertebrate phyla from two different timepoints T1 and T2.** Scale bars and cell colors show count values after variance stabilizing transformations and the taxa list is clustered by similarity and ordered phylogenetically (n= 24).

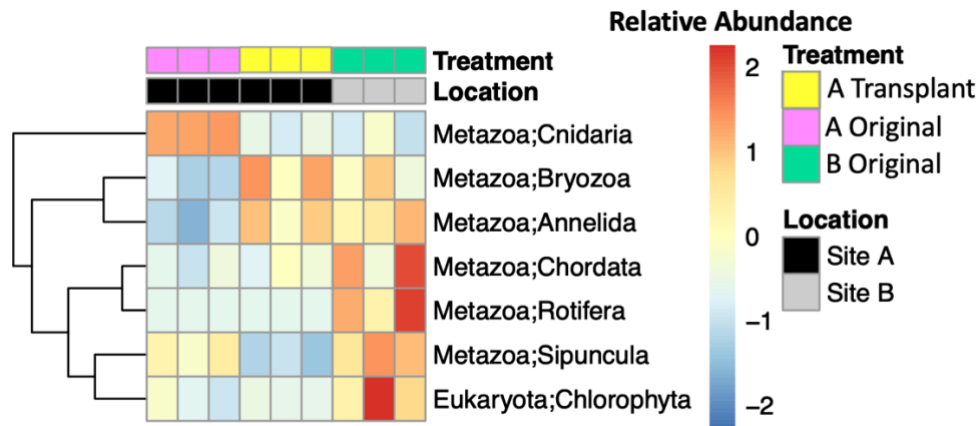

**Fig. 4. Relative abundance of the significantly different invertebrate phyla between the Original tiles from both sites and the tiles Transplanted from Site A to B.** Scale bars and cell colors show count values after variance stabilizing transformations and the taxa list is clustered by similarity and ordered phylogenetically. Significance was determined by  $p\text{-adj} < 0.001$  (n= 9).

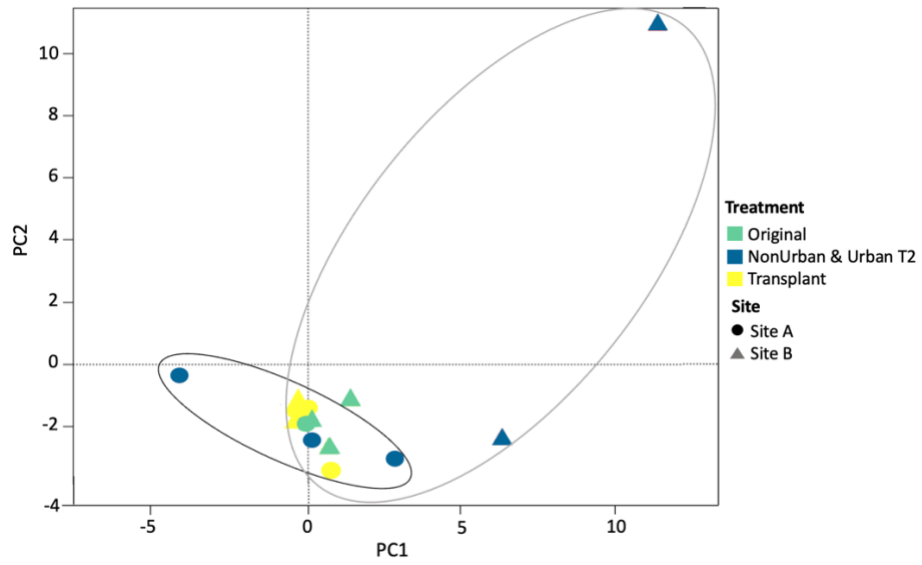

**Fig. 5. Community composition of bacteria on tiles.** Ellipses show distinct clustering using Bray-Curtis dissimilarities to test PERMANOVA differences between site and treatment (n= 18).

NonUrban T1 NonUrban T2 A Original B Transplant Urban T1 Urban T2 B Original A Transplant

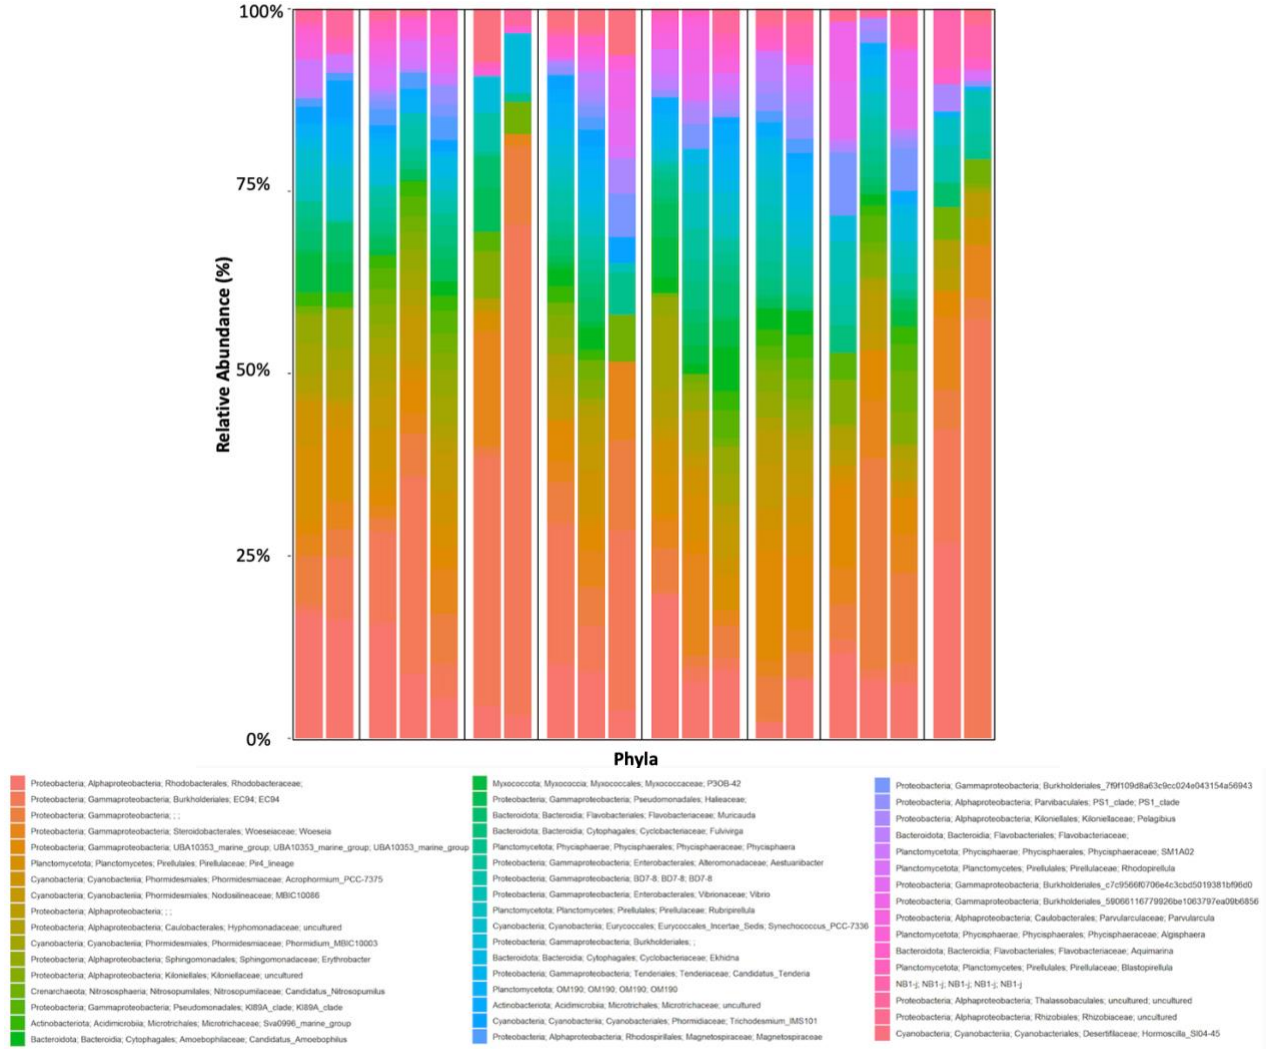

**Fig. 6. Percent relative abundance of the 50 most abundant bacteria phyla.** Samples are categorized by treatment type and site to the family level (n= 20). Missing samples are due to QIIME’s quality filtering or a low read abundance.

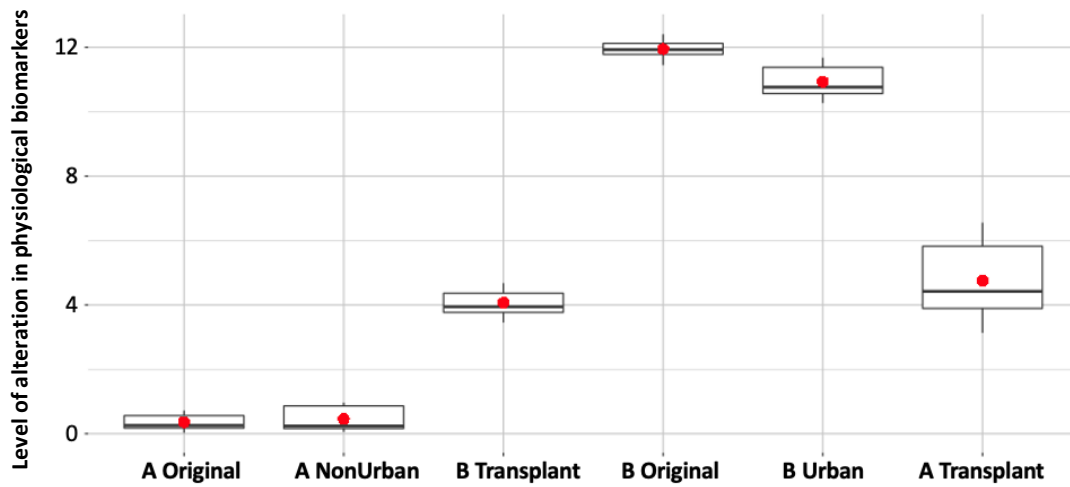

**Fig. 7. Box plot of the IBR approach for *A. eurystoma* correlated to the star plots showing the difference in alteration in the physiological biomarkers. The higher numerical values associated with each plot indicate increased physiological stress (n= 5).**

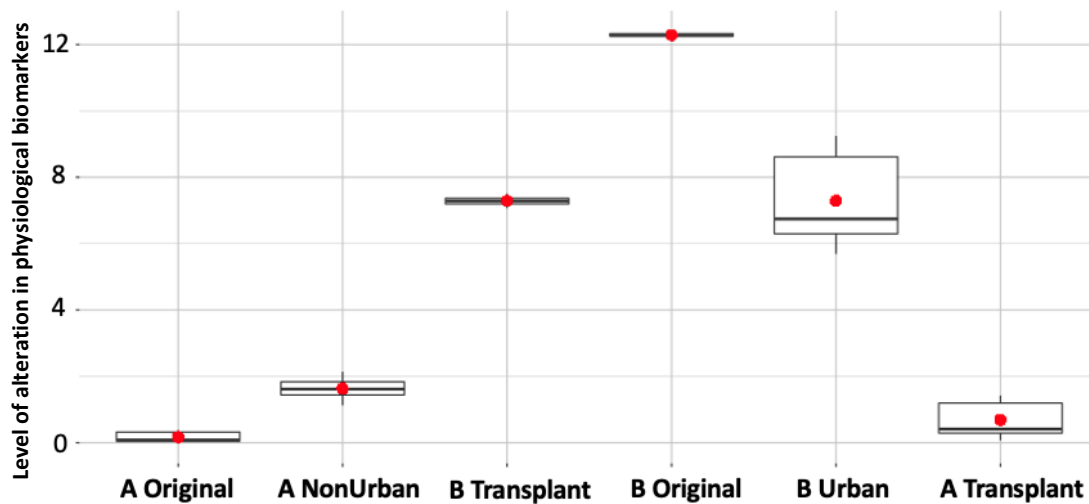

**Fig. 8. Boxplot of the IBR approach for *S. pistillata* correlated to the star plots showing the difference in alteration in the physiological biomarkers. The higher numerical values associated with each plot indicate increased physiological stress (n= 5).**

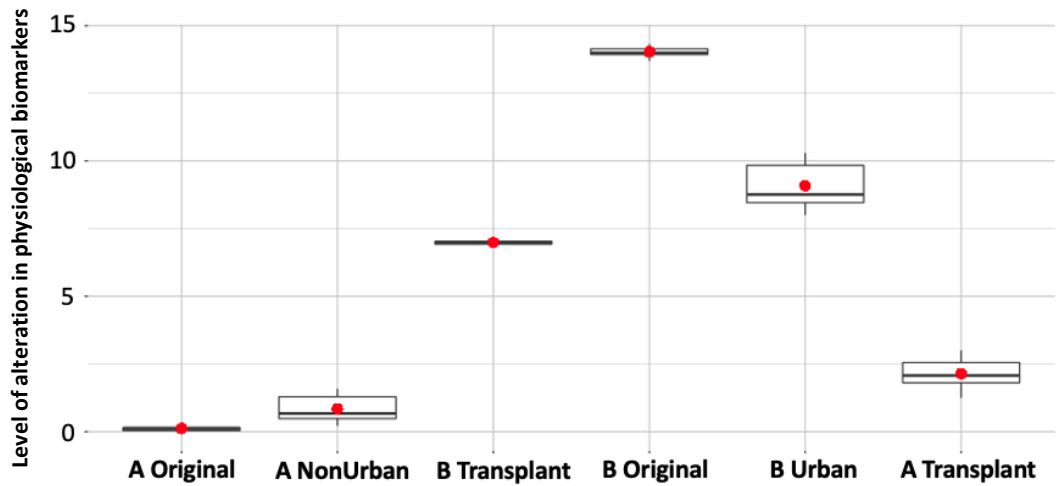

**Fig. 9.** Boxplot of the IBR approach for both coral species correlated to the star plots showing the difference in alteration in the physiological biomarkers. The higher numerical values associated with each plot indicate increased physiological stress (n= 5).

## Supplementary Tables

**Table 1. PERMANOVA was established using a Bray-Curtis dissimilarity metric for all tile samples (eDNA) across sites, treatment, sites and treatment, and treatments within Site A and B. Levels of significance are indicated by p-values using the 9999-permutation test:  $p < 0.0001$  (\*\*\*).**

|             | Terms          | Df | SS      | MS       | F model | R <sup>2</sup> | P-value | Sign. |
|-------------|----------------|----|---------|----------|---------|----------------|---------|-------|
| All Samples | Site:Treatment | 3  | 0.71557 | 0.23852  | 4.5749  | 0.22697        | 1e-04   | ***   |
|             | Residuals      | 12 | 0.62564 | 0.05214  |         | 0.19845        |         |       |
|             | Total          | 19 | 3.15268 |          |         | 1.00000        |         |       |
| Site A      | Treatment      | 3  | 0.89798 | 0.299326 | 7.6537  | 0.79282        | 4e-04   | ***   |
|             | Residuals      | 6  | 0.23465 | 0.039109 |         | 0.20718        |         |       |
|             | Total          | 9  | 1.13263 |          |         | 1.00000        |         |       |
| Site B      | Treatment      | 3  | 1.00759 | 0.33586  | 5.1541  | 0.72044        | 5e-04   | ***   |
|             | Residuals      | 6  | 0.39099 | 0.06517  |         | 0.27956        |         |       |

**Table 2. Significant interactions of light curves obtained for *A. eurystoma*. Pairwise analysis of ETR<sub>max</sub> and PAR<sub>50</sub> values for sites and treatment within each site, using a 2-way ANOVA, post-hoc tests, and the Benjamini-Hochberg (FDR) correction to adjust p-values. Data is expressed as averages  $\pm$  SE,  $p < 0.05$  (\*),  $p < 0.001$  (\*\*), and  $p < 0.0001$  (\*\*\*).**

| Metric             | Location                        | Treatments | SE      | Df | T-ratio | P-value | Sign. |
|--------------------|---------------------------------|------------|---------|----|---------|---------|-------|
| ETR <sub>max</sub> | Across<br>A $\leftrightarrow$ B | Transplant | 3.5287  | 30 | -7.4224 | 0.0001  | ***   |
| PAR <sub>50</sub>  | Across<br>A $\leftrightarrow$ B | Transplant | 16.1812 | 30 | -6.8086 | 0.0001  | ***   |

**Table 3. Significant interactions of light curves obtained for *S. pistillata*. Pairwise analysis of ETR<sub>max</sub> and PAR<sub>50</sub> values for sites and treatment within each site, using a 2-way ANOVA, post-hoc tests, and the Benjamini-Hochberg (FDR) correction to adjust p-values. Data is expressed as averages  $\pm$  SE,  $p < 0.05$  (\*), and  $p < 0.001$  (\*\*).**

| Metric             | Location                        | Treatments | SE      | Df | T-ratio | P-value | Sign. |
|--------------------|---------------------------------|------------|---------|----|---------|---------|-------|
| ETR <sub>max</sub> | Across<br>A $\leftrightarrow$ B | Transplant | 3.8148  | 29 | -3.1387 | 0.05    | *     |
| PAR <sub>50</sub>  | Across<br>A $\leftrightarrow$ B | Transplant | 16.7578 | 29 | -3.0399 | 0.05    | *     |



**Table 4. Chlorophyll-*a* measurements per  $\mu\text{g}/\text{cm}^2$  and algae per cell (pg/cell) for *A. eurystoma* for sites and treatment within each site.** 2-way ANOVAs, post-hoc tests, and the Benjamini-Hochberg (FDR) correction were used to adjust p-values. Data is expressed as averages  $\pm$  SE, ns (no significance),  $p < 0.05$  (\*),  $p < 0.001$  (\*\*), and  $p < 0.0001$  (\*\*\*)).

| Metric                    | Location                        | Treatments          | SE     | Df | T-ratio | P-value |     |
|---------------------------|---------------------------------|---------------------|--------|----|---------|---------|-----|
| $\mu\text{g}/\text{cm}^2$ | Across<br>A $\leftrightarrow$ B | Native              | 0.5242 | 23 | -1.2173 | 0.4193  | ns  |
|                           |                                 | Original            | 0.5242 | 23 | -5.8105 | 0.0001  | *** |
|                           |                                 | NonUrban -<br>Urban | 0.4604 | 23 | -1.7582 | 0.2454  | ns  |
|                           |                                 | Transplant          | 0.4853 | 23 | 1.3331  | 0.3911  | ns  |
| pg/cell                   | Across<br>A $\leftrightarrow$ B | Native              | 1.1603 | 23 | -3.5519 | 0.0068  | **  |
|                           |                                 | Original            | 1.1603 | 23 | -2.8851 | 0.0223  | *   |
|                           |                                 | NonUrban -<br>Urban | 1.0191 | 23 | -5.2508 | 0.0004  | *** |
|                           |                                 | Transplant          | 1.0742 | 23 | 1.1493  | 0.4196  | ns  |

**Table 5. Density of algae (symbionts) for *A. eurystoma* for sites and treatment within each site.** 2-way ANOVAs, post-hoc tests, and the Benjamini-Hochberg (FDR) correction were used to adjust p-values. Data is expressed as averages  $\pm$  SE, ns (no significance),  $p < 0.05$  (\*),  $p < 0.001$  (\*\*), and  $p < 0.0001$  (\*\*\*)).

| Location                        | Treatments          | SE       | Df | T-ratio | P-value |     |
|---------------------------------|---------------------|----------|----|---------|---------|-----|
| Across<br>A $\leftrightarrow$ B | Native              | 276483.9 | 22 | -0.3872 | 0.8488  | ns  |
|                                 | Original            | 298636.8 | 22 | 1.9505  | 0.1662  | ns  |
|                                 | NonUrban -<br>Urban | 285551.4 | 22 | 5.6511  | 0.0002  | *** |
|                                 | Transplant          | 298636.8 | 22 | 0.1673  | 0.8687  | ns  |

**Table 6. Chlorophyll-*a* measurements per  $\mu\text{g}/\text{cm}^2$  and algae per cell (pg/cell) for *S. pistillata* for sites and treatment within each site.** 2-way ANOVAs, post-hoc tests, and the Benjamini-Hochberg (FDR) correction were used to adjust p-values. Data is expressed as averages  $\pm$  SE, ns (no significance),  $p < 0.05$  (\*),  $p < 0.001$  (\*\*), and  $p < 0.0001$  (\*\*\*)).

| Metric                    | Location                        | Treatments          | SE     | Df | T-ratio | P-value |     |
|---------------------------|---------------------------------|---------------------|--------|----|---------|---------|-----|
| $\mu\text{g}/\text{cm}^2$ | Across<br>A $\leftrightarrow$ B | Native              | 0.8459 | 22 | -2.2553 | 0.0612  | ns  |
|                           |                                 | Original            | 0.8459 | 22 | -3.7064 | 0.0039  | **  |
|                           |                                 | NonUrban -<br>Urban | 0.8088 | 22 | 0.4871  | 0.7766  | ns  |
|                           |                                 | Transplant          | 0.8088 | 22 | 3.4592  | 0.006   | **  |
| pg/cell                   | Across<br>A $\leftrightarrow$ B | Native              | 0.9464 | 22 | -9.514  | 0       | *** |
|                           |                                 | Original            | 0.9464 | 22 | -3.6256 | 0.003   | **  |
|                           |                                 | NonUrban -<br>Urban | 0.905  | 22 | -4.4214 | 0.0006  | *** |
|                           |                                 | Transplant          | 0.905  | 22 | 3.3914  | 0.0047  | **  |

**Table 7. Density of algae (symbionts) for *S. pistillata* for sites and treatment within each site.** 2-way ANOVAs, post-hoc tests, and the Benjamini-Hochberg (FDR) correction were used to adjust p-values. Data is expressed as averages  $\pm$  SE, ns (no significance),  $p < 0.05$  (\*),  $p < 0.001$  (\*\*), and  $p < 0.0001$  (\*\*\*)).

| Location                        | Treatments          | SE       | Df | T-ratio | P-value |    |
|---------------------------------|---------------------|----------|----|---------|---------|----|
| Across<br>A $\leftrightarrow$ B | Native              | 870206.4 | 17 | 2.0528  | 0.1786  | ns |
|                                 | Original            | 930289.8 | 17 | 1.8013  | 0.2044  | ns |
|                                 | NonUrban -<br>Urban | 930289.8 | 17 | 1.8916  | 0.2019  | ns |
|                                 | Transplant          | 930289.8 | 17 | -2.4973 | 0.0923  | ns |

**Table 8. All interactions of total antioxidant capacity (TAC) for *A. eurystoma* and *S. pistillata*.** Pairwise analysis of TAC values across Sites and Treatments and Treatments within each site was conducted using a 2-way ANOVA, post-hoc tests, and the Benjamini-Hochberg (FDR) correction to adjust p-values. Ns (no significance), p<0.05 (\*), p<0.001 (\*\*), and p<0.0001 (\*\*\*).

***A. eurystoma***

| Location      | Treatments       | SE       | Df | T-ratio | P-value |     |
|---------------|------------------|----------|----|---------|---------|-----|
| Across<br>A↔B | Original         | 906.0947 | 21 | 5.1129  | 0.0001  | *** |
| Across<br>A↔B | NonUrban - Urban | 961.0586 | 21 | 2.2589  | 0.039   | *   |
| Across<br>A↔B | Transplant       | 1046.268 | 21 | -4.4715 | 0.0001  | *** |

***S. pistillata***

|               |                  |          |    |         |        |     |
|---------------|------------------|----------|----|---------|--------|-----|
| Across<br>A↔B | Original         | 2023.119 | 13 | 5.9801  | 0.0001 | *** |
| Across<br>A↔B | NonUrban - Urban | 1892.454 | 13 | 1.4521  | 0.2188 | ns  |
| Across<br>A↔B | Transplant       | 2023.119 | 13 | -5.8459 | 0.0001 | *** |

**Table 9. Differential abundance analysis identified 10 bacteria families with significant differences between Original A and Transplant A tiles.** Significance was determined using general linear model coefficients with a log<sub>2</sub> fold change to achieve adjusted p-values, where p-adj<0.05 (\*), p<0.001 (\*\*), and p<0.0001 (\*\*\*).

| Phyla                                                                                         | adjusted p-value |
|-----------------------------------------------------------------------------------------------|------------------|
| Cyanobacteria; Cyanobacteriia;<br>Phormidesmiales; Phormidesmiaceae;<br>Acrophormium PCC-7375 | 2.27E-15         |
| Proteobacteria; Gammaproteobacteria;<br>Pseudomonadales; Halieaceae                           | 1.19E-09         |
| Planctomycetota; Planctomycetes;<br>Pirellulales; Pirellulaceae; Pir4 lineage                 | 1.49E-08         |
| Proteobacteria; Gammaproteobacteria;<br>Pseudomonadales; KI89A clade                          | 2.53E-05         |
| Planctomycetota; Planctomycetes;<br>Pirellulales; Pirellulaceae; Rubripirellula               | 0.00080038       |
| NB1-j; NB1-j; NB1-j; NB1-j; NB1-j                                                             | 0.00541498       |
| Proteobacteria; Alphaproteobacteria;<br>Caulobacterales; Hyphomonadaceae;<br>uncultured       | 0.00633812       |
| Proteobacteria; Gammaproteobacteria;<br>Enterobacterales; Vibrionaceae; Vibrio                | 0.02391366       |
| Proteobacteria; Gammaproteobacteria;<br>Burkholderiales                                       | 0.03842134       |
| Proteobacteria; Gammaproteobacteria;<br>UBA10353_marine group; UBA10353                       | 0.04575013       |

**Table 10. Differential abundance analysis identified 21 bacteria families with significant differences between Original B and Transplant A tiles.** Significance was determined using general linear model coefficients with a log2 fold change to achieve adjusted p-values, where p-adj<0.05 (\*), p<0.001 (\*\*), and p<0.0001 (\*\*\*).

| Phyla                                                                                   | adjusted p-value |
|-----------------------------------------------------------------------------------------|------------------|
| Cyanobacteria; Cyanobacteriia; Phormidesmiales; Nodosilineaceae; MBIC10086              | 7.26E-11         |
| Proteobacteria; Gammaproteobacteria; Pseudomonadales; Halieaceae                        | 6.99E-10         |
| Planctomycetota; Planctomycetes; Pirellulales; Pirellulaceae; Pir4 lineage              | 9.22E-08         |
| Proteobacteria; Gammaproteobacteria; Pseudomonadales; KI89A clade                       | 1.82E-07         |
| Bacteroidota; Bacteroidia; Cytophagales; Cyclobacteriaceae; Ekhidna                     | 1.32E-07         |
| Bacteroidota; Bacteroidia; Flavobacteriales; Flavobacteriaceae                          | 5.59E-06         |
| Bacteroidota; Bacteroidia; Chitinophagales; Saprospiraceae; uncultured                  | 4.49E-05         |
| Bacteroidota; Bacteroidia; Cytophagales; Amoebophilaceae; Candidatus Amoebophilus       | 8.18E-05         |
| Proteobacteria; Gammaproteobacteria; Burkholderiales; c7c9566f0706e4c3cbd5019381bf96d0  | 9.75E-05         |
| Proteobacteria; Gammaproteobacteria; Burkholderiales; 59066116779926be1063797ea09b6856  | 9.93E-05         |
| Proteobacteria; Gammaproteobacteria; Burkholderiales; 7f9f109d8a63c9cc024e043154a56943  | 9.93E-05         |
| Myxococcota; Myxococcia; Myxococcales; Myxococcaceae; P3OB-42                           | 0.00012701       |
| Chloroflexi; Anaerolineae; SBR1031; A4b; A4b                                            | 0.00039664       |
| Bacteroidota; Bacteroidia; Cytophagales; Cyclobacteriaceae; Fulvivirga                  | 0.00325593       |
| Proteobacteria; Gammaproteobacteria; Tenderiales; Tenderiaceae; Candidatus Tenderia     | 0.01572549       |
| Gemmatimonadota; BD2-11_terrestrial_group; BD2-11                                       | 0.02120412       |
| Proteobacteria; Alphaproteobacteria; Rhizobiales; Stappiaceae; Labrenzia                | 0.02120412       |
| Proteobacteria; Gammaproteobacteria; Burkholderiales;                                   | 0.02120412       |
| Proteobacteria; Gammaproteobacteria; Burkholderiales; EC94                              | 0.02120412       |
| Proteobacteria; Alphaproteobacteria; Rhizobiales; Stappiaceae                           | 0.0246093        |
| Actinobacteriota; Acidimicrobiia; Microtrichales; Microtrichaceae; Sva0996_marine_group | 0.02675962       |

**Table 11. Level of significance (adjusted for multiple comparisons) for the pairwise comparisons of IBR values between categories in *A. Eurystoma*.** The IBR value is an average of all permutations, with the highest values indicating the highest biological alteration. Ns (no significance), p<0.05 (\*), p<0.001 (\*\*), and p<0.0001 (\*\*\*).

| <b>Condition</b>                                      | <b>adjusted p-value</b> |
|-------------------------------------------------------|-------------------------|
| A NonUrban vs. A Original                             | 0.803                   |
| A Transplant from Site B vs. A Original               | <b>5.67e-05</b>         |
| A Transplant from Site B vs. A NonUrban               | <b>0.000383</b>         |
| B Original vs. A Original                             | <b>6.38e-07</b>         |
| B Original vs. A NonUrban                             | <b>1.29e-06</b>         |
| B Original vs. A Transplant from Site B               | <b>1.77e-05</b>         |
| B Urban vs. A Original                                | <b>1.5e-06</b>          |
| B Urban vs. A NonUrban                                | <b>6.34e-06</b>         |
| B Urban vs. A Transplant from Site B                  | <b>2.25e-05</b>         |
| B Urban vs. B Original                                | <b>0.00948</b>          |
| B Transplant from Site A vs. A Original               | <b>0.00226</b>          |
| B Transplant from Site A vs. A NonUrban               | <b>0.00218</b>          |
| B Transplant from Site A vs. A Transplant from Site B | 0.422                   |
| B Transplant from Site A vs. B Original               | <b>0.000374</b>         |
| B Transplant from Site A vs. B Urban                  | <b>0.000683</b>         |

**Table 12. Level of significance for the IBR approach (adjusted for multiple comparisons) for the pairwise comparisons of IBR values between categories in *S. pistillata*.** The IBR value is an average of all permutations, with the highest values indicating the highest biological alteration. Ns (no significance),  $p < 0.05$  (\*),  $p < 0.001$  (\*\*), and  $p < 0.0001$  (\*\*\*)

| <b>Condition</b>                                      | <b>adjusted p-value</b> |
|-------------------------------------------------------|-------------------------|
| A NonUrban vs. A Original                             | <b>0.000228</b>         |
| A Transplant from Site B vs. A Original               | <b>1.73e-07</b>         |
| A Transplant from Site B vs. A NonUrban               | <b>2.3e-06</b>          |
| B Original vs. A Original                             | <b>2.53e-08</b>         |
| B Original vs. A NonUrban                             | <b>3.27e-07</b>         |
| B Original vs. A Transplant from Site B               | <b>2.77e-07</b>         |
| B Urban vs. A Original                                | <b>0.000432</b>         |
| B Urban vs. A NonUrban                                | <b>0.000927</b>         |
| B Urban vs. A Transplant from Site B                  | 0.929                   |
| B Urban vs. B Original                                | <b>0.00115</b>          |
| B Transplant from Site A vs. A Original               | 0.313                   |
| B Transplant from Site A vs. A NonUrban               | 0.0596                  |
| B Transplant from Site A vs. A Transplant from Site B | <b>1.79e-05</b>         |
| B Transplant from Site A vs. B Original               | <b>9.31e-07</b>         |
| B Transplant from Site A vs. B Urban                  | <b>0.00129</b>          |

**Table 13. Level of significance for the IBR approach (adjusted for multiple comparisons) for the pairwise comparisons of IBR values between categories for both corals together.** The IBR value is an average of all permutations, with the highest values indicating the highest biological alteration. Ns (no significance),  $p < 0.05$  (\*),  $p < 0.001$  (\*\*), and  $p < 0.0001$  (\*\*\*)

| <b>Condition</b>                                      | <b>adjusted p-value</b> |
|-------------------------------------------------------|-------------------------|
| A NonUrban vs. A Original                             | <b>0.000897</b>         |
| A Transplant from Site B vs. A Original               | <b>&lt;2e-16</b>        |
| A Transplant from Site B vs. A NonUrban               | <b>7.66e-12</b>         |
| B Original vs. A Original                             | <b>&lt;2e-16</b>        |
| B Original vs. A NonUrban                             | <b>1.39e-13</b>         |
| B Original vs. A Transplant from Site B               | <b>4.24e-15</b>         |
| B Urban vs. A Original                                | <b>1.16e-10</b>         |
| B Urban vs. A NonUrban                                | <b>2.16e-09</b>         |
| B Urban vs. A Transplant from Site B                  | <b>2.45e-05</b>         |
| B Urban vs. B Original                                | <b>1.26e-08</b>         |
| B Transplant from Site A vs. Original                 | <b>1.28e-06</b>         |
| B Transplant from Site A vs. A NonUrban               | <b>6e-04</b>            |
| B Transplant from Site A vs. A Transplant from Site B | <b>8.42e-10</b>         |
| B Transplant from Site A vs. Original                 | <b>3.44e-13</b>         |
| B Transplant from Site A vs. B Urban                  | <b>9.63e-09</b>         |
