# Supplementary material for: Ecosystem transplant from a healthy reef boosts coral health at a degraded reef
Source: PubMed Central journal article supplement — Nat Commun. 2024 Nov 19;15:10033. doi: 10.1038/s41467-024-54149-6 (PMC11577037; doi:10.1038/s41467-024-54149-6), 2024-11-19
Supplement: 41467_2024_54149_MOESM3_ESM.pdf [file 41467_2024_54149_MOESM3_ESM.pdf]

Supplementary Data 1

Site conditions for Site A and B from Winter 2020 to Summer 2022, encompassing the time before, during, and after study. Date format is month and year.

Supplementary Data 2

Data accession codes and explanation.
