# Supplementary material for: Ecosystem transplant from a healthy reef boosts coral health at a degraded reef
Source: PubMed Central journal article supplement — Nat Commun. 2024 Nov 19;15:10033. doi: 10.1038/s41467-024-54149-6 (PMC11577037; doi:10.1038/s41467-024-54149-6), 2024-11-19
Supplement: 41467_2024_54149_MOESM5_ESM.pdf [file 41467_2024_54149_MOESM5_ESM.pdf]

## **Data accession codes**

The sequencing data generated from this study has been deposited in the NCBI public database under accession code PRJNA1114437 [<https://www.ncbi.nlm.nih.gov/bioproject/PRJNA1114437/>].

The coral physiology data generated from this study is publicly available at SEANOE (sea scientific open data publication) [ <https://doi.org/10.17882/102809>].
